# Supplementary material for: Engineering a dual-porous Li-rich carbon-coated Si/SiOx nanosphere as a high-performance Li-ion battery anode
Source: Royal Society of Chemistry journal article supplement (doi:10.1039/d4cc06590e), 2025-01-01
Supplement: d4cc06590e1.pdf [file d4cc06590e1.pdf]

Electronic Supplementary Information (ESI) for Chemical Communications. This journal is (c) The Royal Society of Chemistry 2025.

Electronic Supplementary Information (ESI)

## **Engineering a dually-porous Li-rich carbon coated Si/SiO<sub>x</sub> nanosphere as high-performance Li-ion battery anode**

Yajun Zhu<sup>a</sup>, Hui Zhang<sup>a</sup>, Xiangbing Zeng<sup>b</sup>, Tianli Han<sup>a</sup>, Meizhou Qi<sup>c</sup>, Wentuan Bi<sup>c,\*</sup>,  
Jinyun Liu<sup>a,\*</sup>

### **Experimental**

#### ***Preparation of SiO<sub>2</sub> spheres***

Typically, 2 mL of ammonia was added to a mixture of 40 mL of ethanol and 8 mL of deionized water. After magnetic stirring 30 min, 1.6 mL of tetraethyl silicate was added dropwise, followed by an additional hour of continuous stirring. The sample was then collected, centrifuged for cleaning and dried in an oven at 60 °C.

#### ***Preparation of porous Si/SiO<sub>x</sub> spheres***

The SiO<sub>2</sub> spheres synthesized in the previous step were mixed and milled for 10 minutes by thermal reduction of magnesium powder. Specifically, the mass ratio of SiO<sub>2</sub> to Mg powder was 1:2. Then, the mixture was placed in a hydrogen-argon mixed gas atmosphere and calcined at 650 °C for 6 h with a heating temperature rate of 5 °C per minute. After the calcination was completed, the sample was soaked in 3 M HCl solution for 5 h. The sample was alternately washed with HCl solution and deionized water, and dried at 60 °C to obtain porous Si/SiO<sub>x</sub> spheres.

#### ***Preparation of DP Si/SiO<sub>x</sub>@Li-C***

0.1 g of the as-prepared porous Si/SiO<sub>x</sub> spheres was dispersed in 50 mL of

deionized water, and sonicated for 10 min. Then, 1.21 g of trihydroxymethyl aminomethane was added under stirring. The pH was adjusted to 8-8.5 by HCl solution, and 60 mg of dopamine hydrochloride was added. Finally, 0.2 g of LiNO<sub>3</sub> was dissolved. The reaction was carried out for 24 h. The sample was collected and washed with deionized water and ethanol, and dried at 60 °C. The sample was calcined at 550 °C for 2 h in a nitrogen atmosphere at a heating rate of 2 °C per minute. In control experiments, lithium salt was replaced by Li<sub>2</sub>CO<sub>3</sub> or LiCl during the preparation to obtain DP Si/SiO<sub>x</sub>@Li<sub>2</sub>CO<sub>3</sub>-C and DP Si/SiO<sub>x</sub>@LiCl-C, respectively. P-Si/SiO<sub>x</sub>@C was obtained without the addition of lithium source. DP Si/SiO<sub>x</sub>@Li-C-0.6 was prepared by increasing the thickness of carbon layer, and Si@Li-C was synthesized by using Si nanospheres purchased from Aladdin.

### ***Characterization***

Morphology of the samples were analyzed by scanning electron microscopy and transmission electron microscopy. The structure and composition were characterized by XRD (Bruner D8 Advance), XPS (ESCALAB 250), Raman spectroscopy (Renishaw, in Via) and BET analyzer (ASAP 2460). The carbon content of the samples was analyzed using thermogravimetric analysis (TGA, Setaram Labsys Evo SDT Q600).

### ***Electrochemical tests***

The active material, acetylene black and polyvinylidene fluoride were mixed with a mass ratio of 7:2:1. The mixture was dispersed in N-methylpyrrolidone. After magnetic stirring for 8 h, the slurry was uniformly coated onto the copper foil, and placed in vacuum oven at 80 °C. Coin cells were assembled in a glove box. The electrolyte contained LiPF<sub>6</sub> with the volume ratio of ethylidene carbonate (EC) to diethyl carbonate (DEC) being 1:1. Electrochemical performance tests were conducted on the Neware battery system. CV curves and EIS spectra were measured using an electrochemical workstation (CHI 660E).

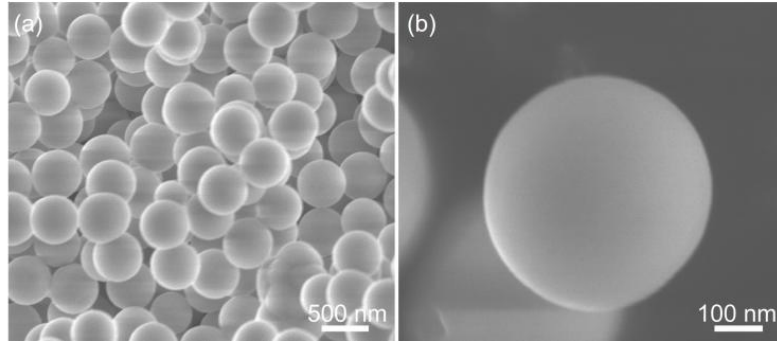

**Fig. S1** (a,b) SEM images of the as-synthesized SiO<sub>2</sub>.

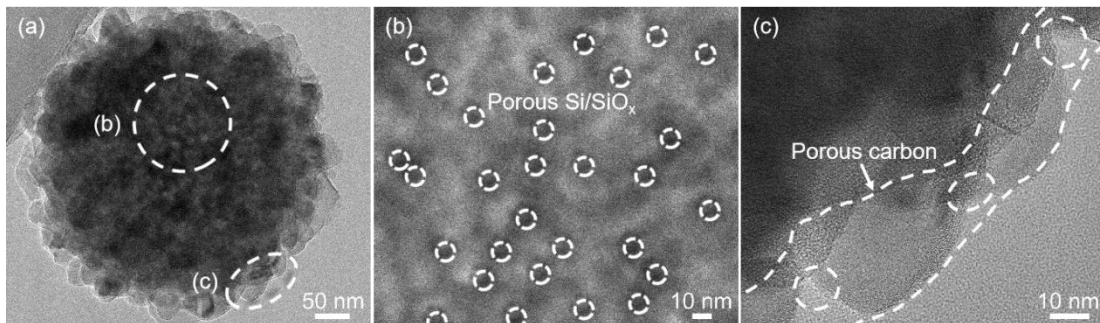

**Fig. S2** TEM images of DP Si/SiO<sub>x</sub>@Li-C: (a) individual spheres, (b) porous Si/SiO<sub>x</sub> in the interior and (c) porous carbon layer at the edge.

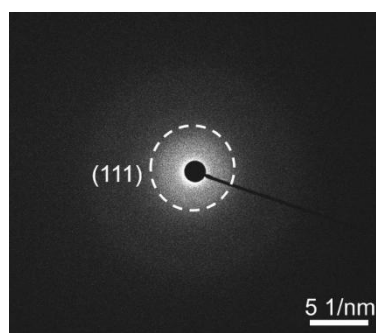

**Fig. S3** SAED pattern of DP Si/SiO<sub>x</sub>@Li-C.

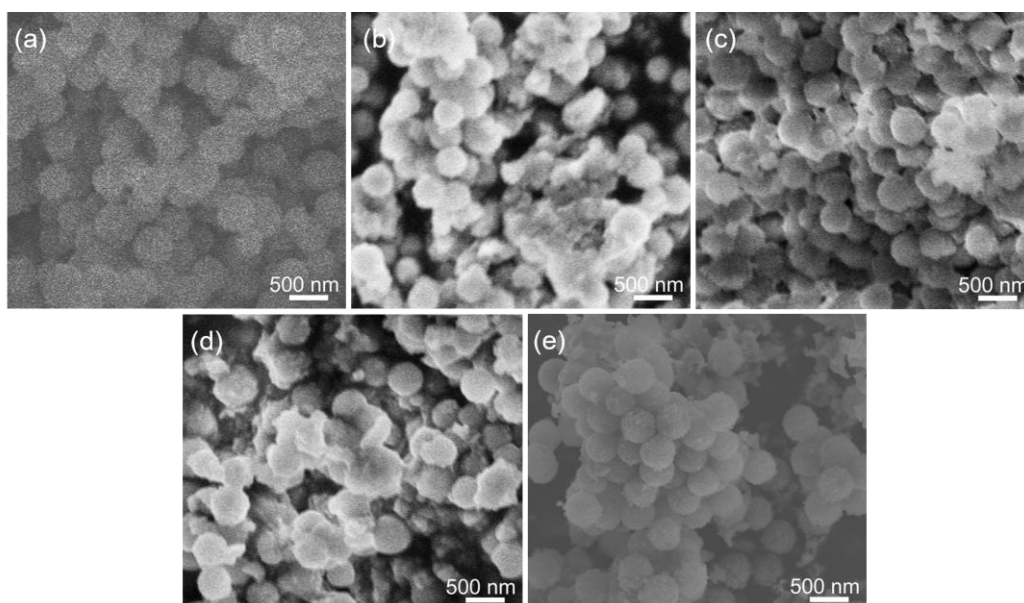

**Fig. S4** SEM images of (a) Si@Li-C, (b) DP Si/SiO<sub>x</sub>@Li-C-0.6, (c) DP Si/SiO<sub>x</sub>@Li<sub>2</sub>CO<sub>3</sub>-C, (d) DP Si/SiO<sub>x</sub>@LiCl-C, and (e) P-Si/SiO<sub>x</sub>@C.

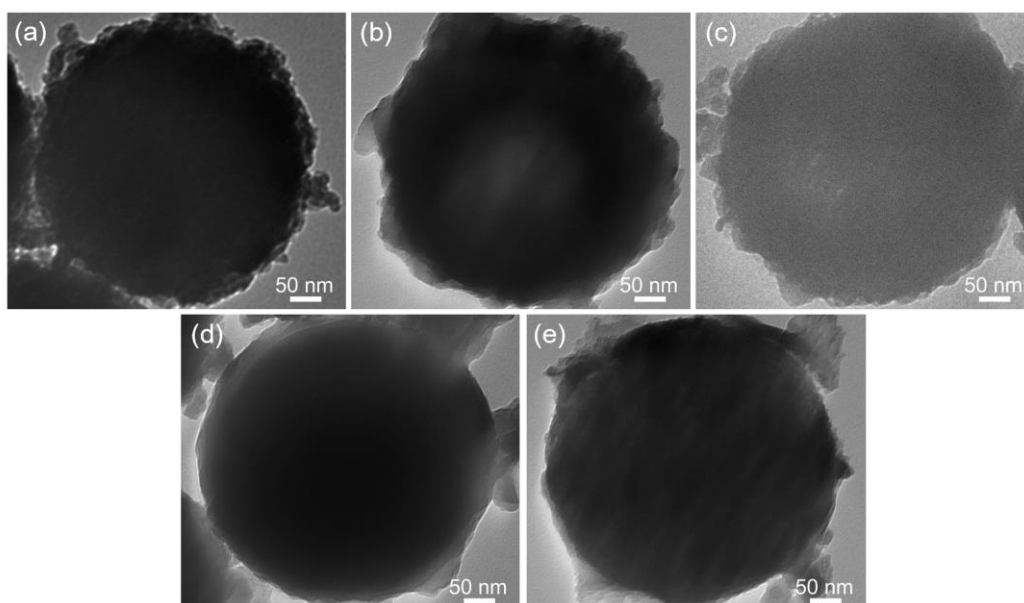

**Fig. S5** TEM images of (a) Si@Li-C, (b) DP Si/SiO<sub>x</sub>@Li-C-0.6, (c) DP Si/SiO<sub>x</sub>@Li<sub>2</sub>CO<sub>3</sub>-C, (d) DP Si/SiO<sub>x</sub>@LiCl-C, and (e) P-Si/SiO<sub>x</sub>@C.

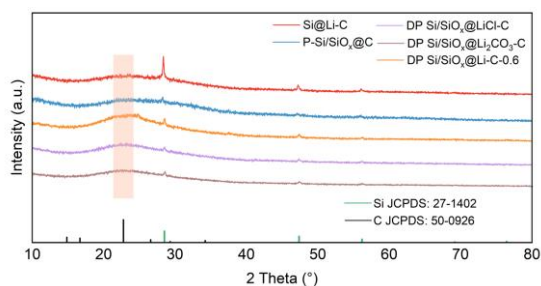

**Fig. S6** XRD patterns of Si@Li-C, DP Si/SiO<sub>x</sub>@Li-C-0.6, DP Si/SiO<sub>x</sub>@Li<sub>2</sub>CO<sub>3</sub>-C, DP Si/SiO<sub>x</sub>@LiCl-C, and P-Si/SiO<sub>x</sub>@C.

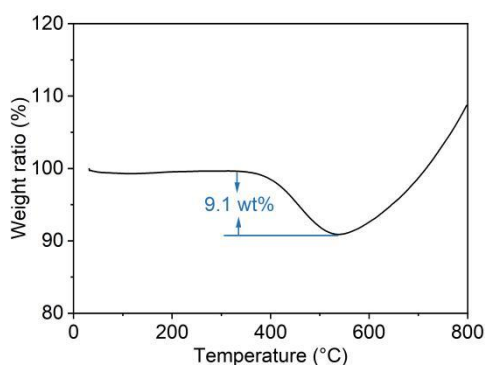

**Fig. S7** TGA curve of DP Si/SiO<sub>x</sub>@Li-C. The 9.1% mass loss between 300-550°C is ascribed to carbon decomposition, so the mass content of Si is about 1-9.1%=90.9%, indicating that the mass ratio of Si:C is 9:1 approximately since the light weight of supplied Li in the composite is non-obvious compared to Si and carbon.

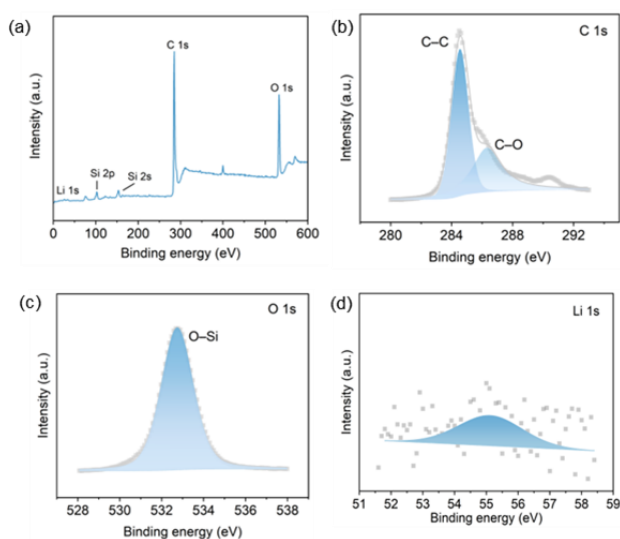

**Fig. S8** XPS spectra of DP Si/SiO<sub>x</sub>@Li-C: (a) survey spectrum, (b) C 1s, (c) O 1s, and (d) Li 1s.

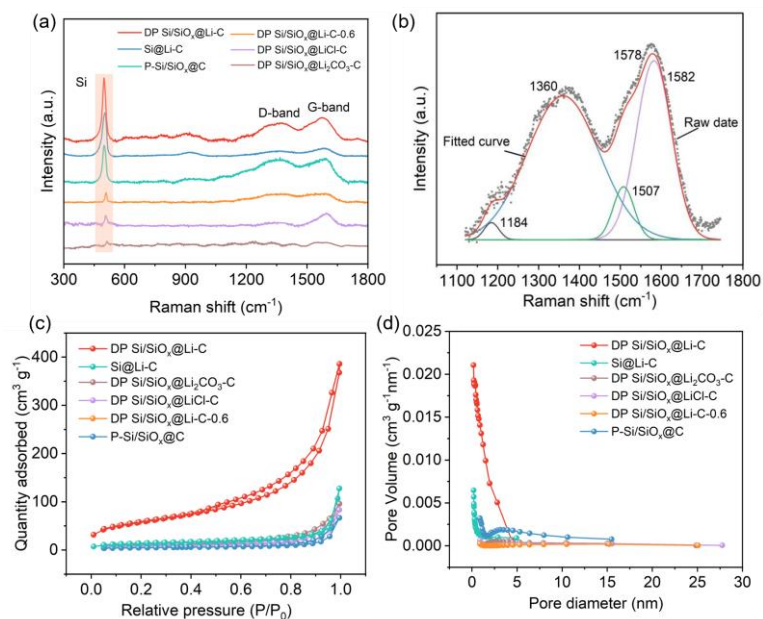

**Fig. S9** (a) Raman spectra and (b) the deconvoluted spectra of DP Si/SiO<sub>x</sub>@Li-C at the D and G bands. (c) The N<sub>2</sub> adsorption-desorption isotherms and (d) pore-size distribution of Si@Li-C, DP Si/SiO<sub>x</sub>@Li-C-0.6, DP Si/SiO<sub>x</sub>@Li<sub>2</sub>CO<sub>3</sub>-C, DP Si/SiO<sub>x</sub>@LiCl-C, P-Si/SiO<sub>x</sub>@C, and DP Si/SiO<sub>x</sub>@Li-C.

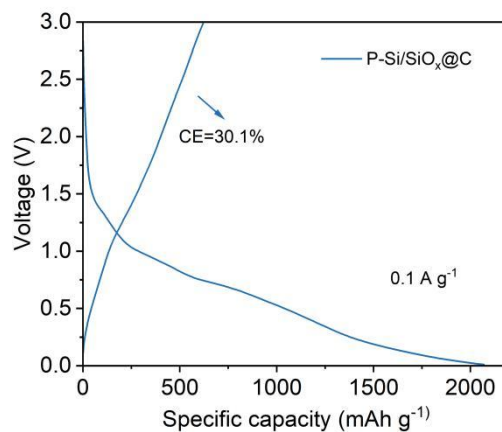

**Fig. S10** First-cycle charge-discharge profile of P-Si/SiO<sub>x</sub>@C anode at 0.1 A g<sup>-1</sup>.

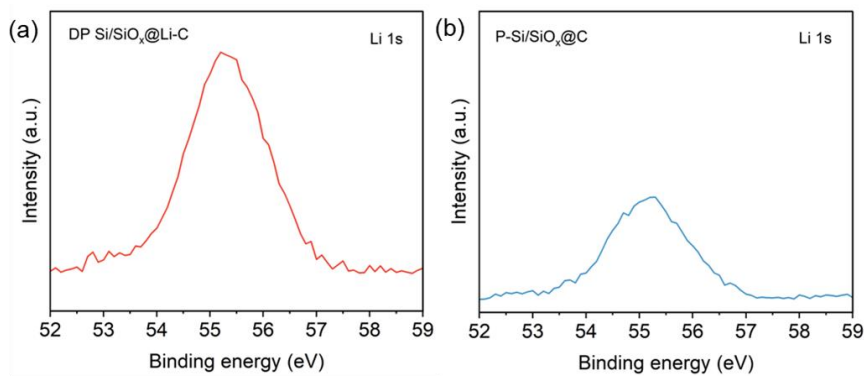

**Fig. S11** XPS spectra of Li 1s in (a) DP Si/SiO<sub>x</sub>@Li-C and (b) P-Si/SiO<sub>x</sub>@C after the first two cycles.

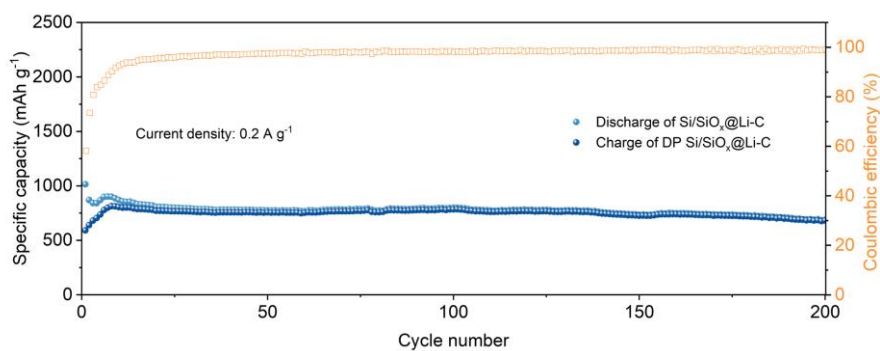

**Fig. S12** Cycling performance of DP Si/SiO<sub>x</sub>@Li-C at 0.2 A g<sup>-1</sup>.

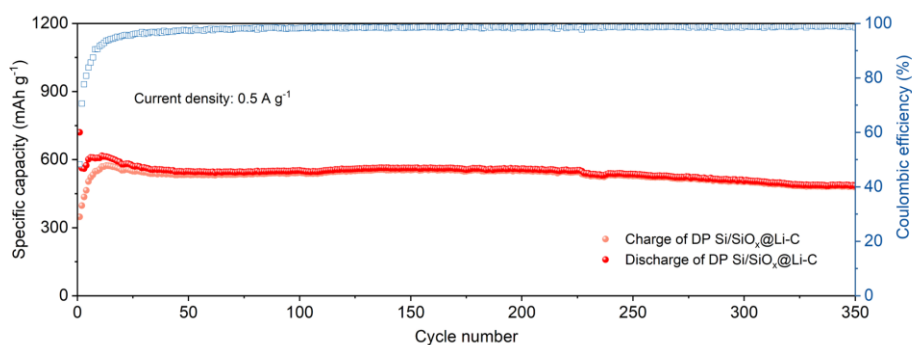

**Fig. S13** Cycling performance of DP Si/SiO<sub>x</sub>@Li-C at 0.5 A g<sup>-1</sup>.

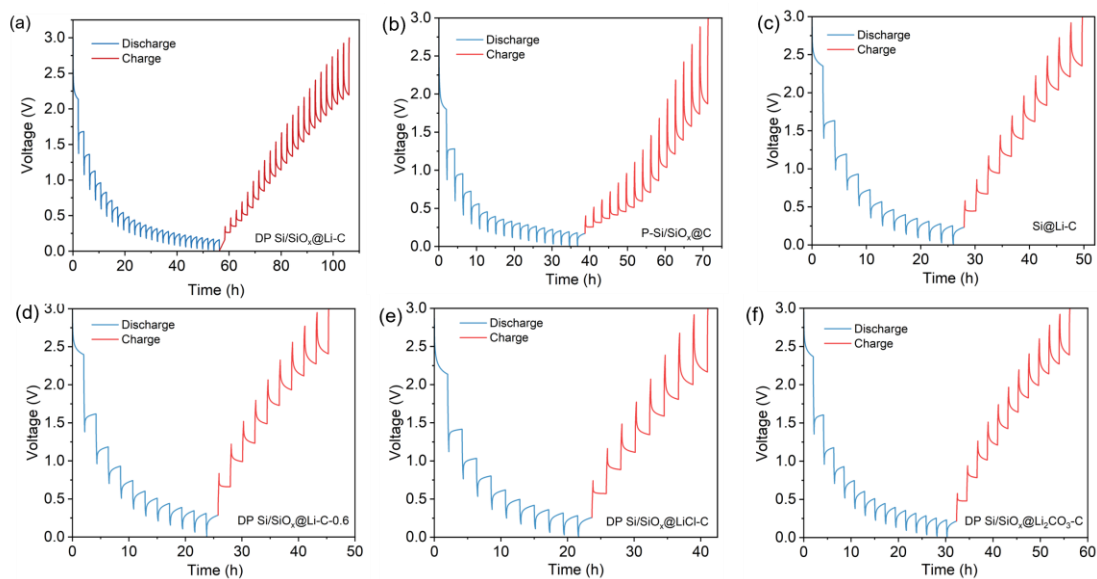

**Fig. S14** GITT time-potential distributions of (a) DP Si/SiO<sub>x</sub>@Li-C, (b) P-Si/SiO<sub>x</sub>@C, (c) Si@Li-C, (d) DP Si/SiO<sub>x</sub>@Li-C-0.6, (e) DP Si/SiO<sub>x</sub>@LiCl-C, and (f) DP Si/SiO<sub>x</sub>@Li<sub>2</sub>CO<sub>3</sub>-C.

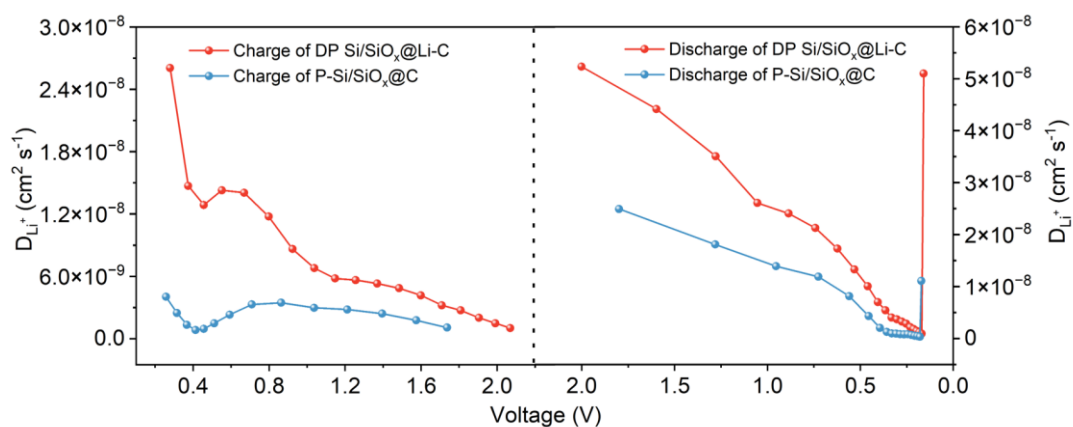

**Fig. S15** Ion diffusion coefficients during discharge-charge of DP Si/SiO<sub>x</sub>@Li-C and P-Si/SiO<sub>x</sub>@C.



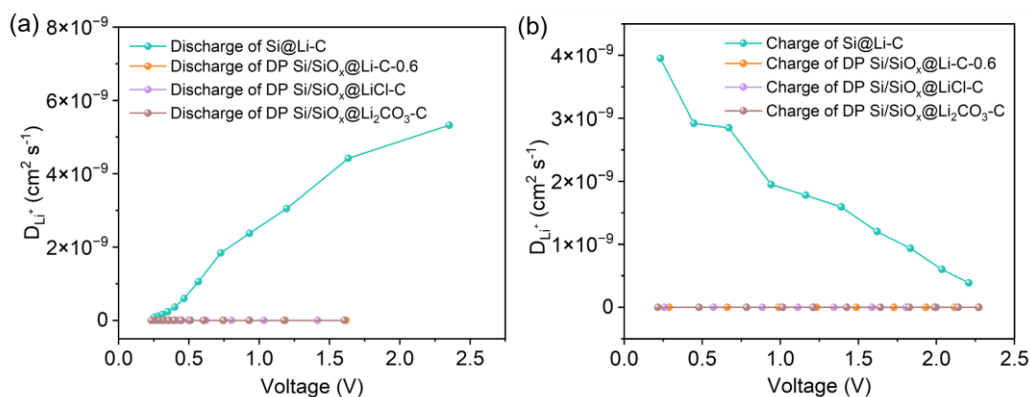

**Fig. S16** Ion diffusion coefficients of Si@Li-C, DP Si/SiO<sub>x</sub>@Li-C-0.6, DP Si/SiO<sub>x</sub>@LiCl-C, and DP Si/SiO<sub>x</sub>@Li<sub>2</sub>CO<sub>3</sub>-C during (a) discharge and (b) charge.

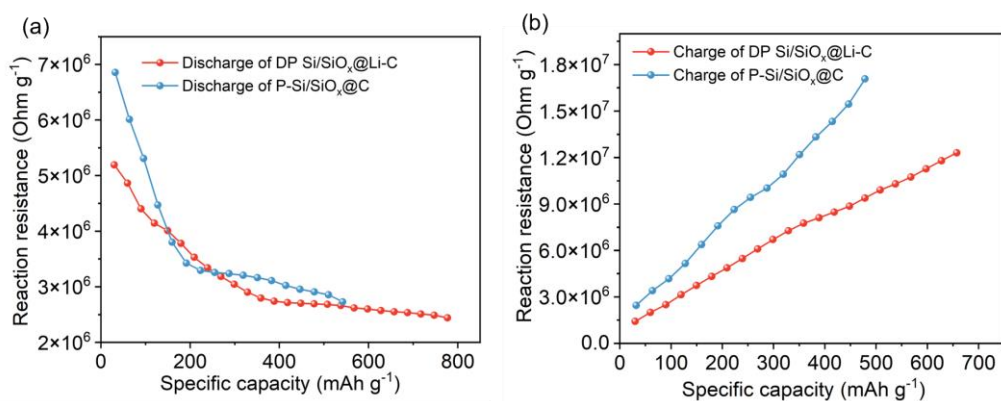

**Fig. S17** *In-situ* reaction resistance during (a) discharge and (b) charge of DP Si/SiO<sub>x</sub>@Li-C and P-Si/SiO<sub>x</sub>@C.

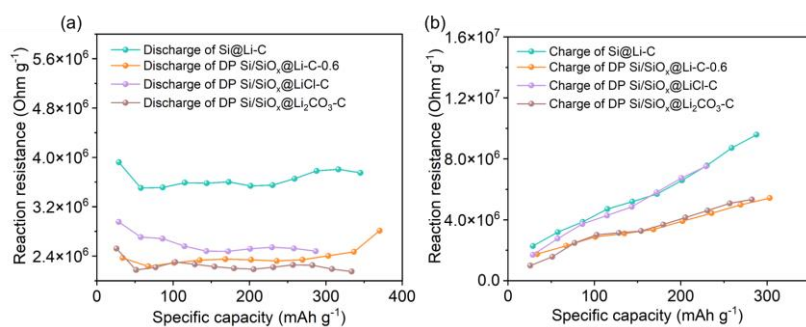

**Fig. S18** *In-situ* reaction impedances of Si@Li-C, DP Si/SiO<sub>x</sub>@Li-C-0.6, DP Si/SiO<sub>x</sub>@LiCl-C, and DP Si/SiO<sub>x</sub>@Li<sub>2</sub>CO<sub>3</sub>-C during (a) discharge and (b) charge.

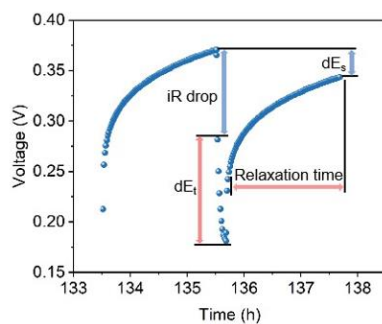

**Fig. S19** Illustration of  $IR$  drop,  $dE_s$ , and  $dE\tau$ .

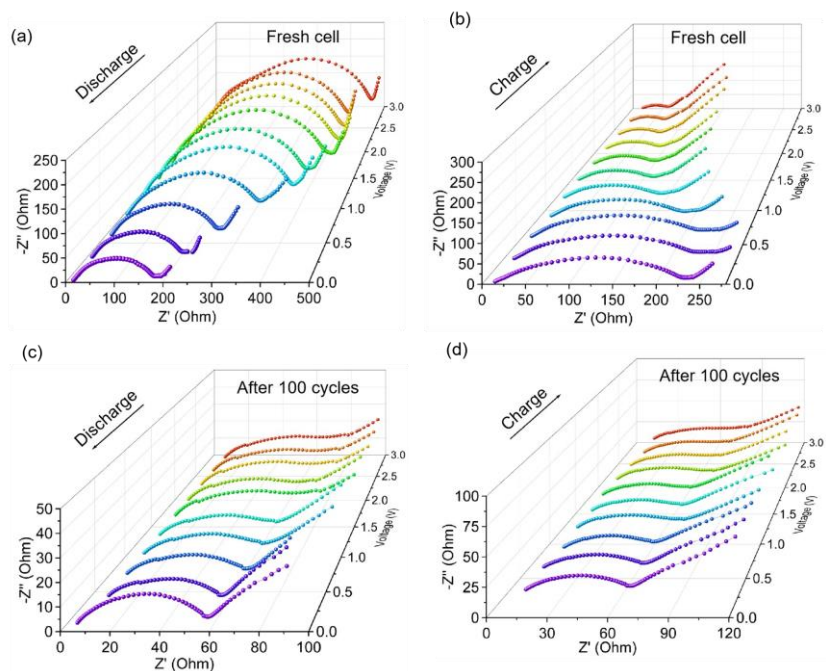

**Fig. S20** (a,b) *In-situ* impedance spectra of DP Si/SiO<sub>x</sub>@Li-C-based fresh LIBs at different discharge-charge voltage. (c,d) *In-situ* impedance spectra of the battery after 100 cycles at 0.1 A g<sup>-1</sup> at different discharge-charge voltage.

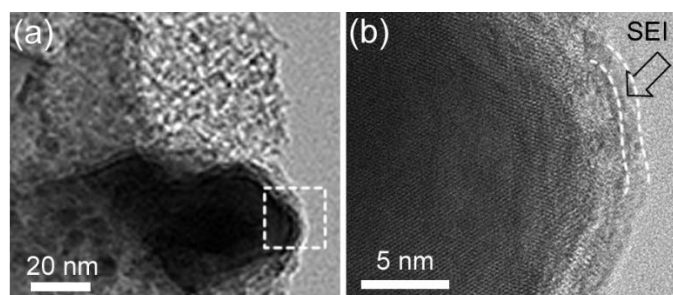

**Fig. S21** (a,b) HRTEM images of DP Si/SiO<sub>x</sub>@Li-C after 5 cycles at 0.1 A g<sup>-1</sup>.

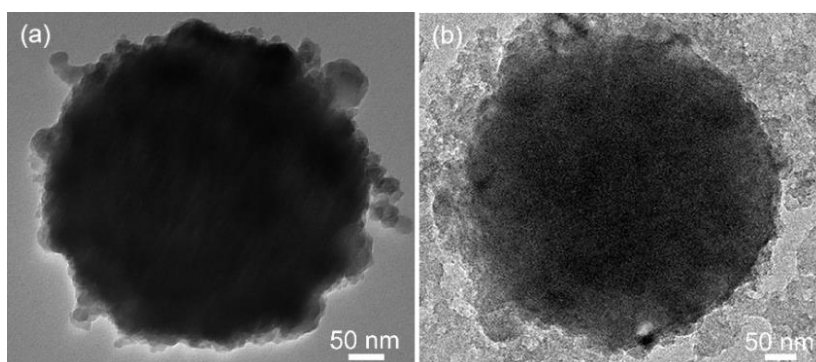

**Fig. S22** TEM images of (a) pristine and (b) lithiated DP Si/SiO<sub>x</sub>@Li-C spheres.

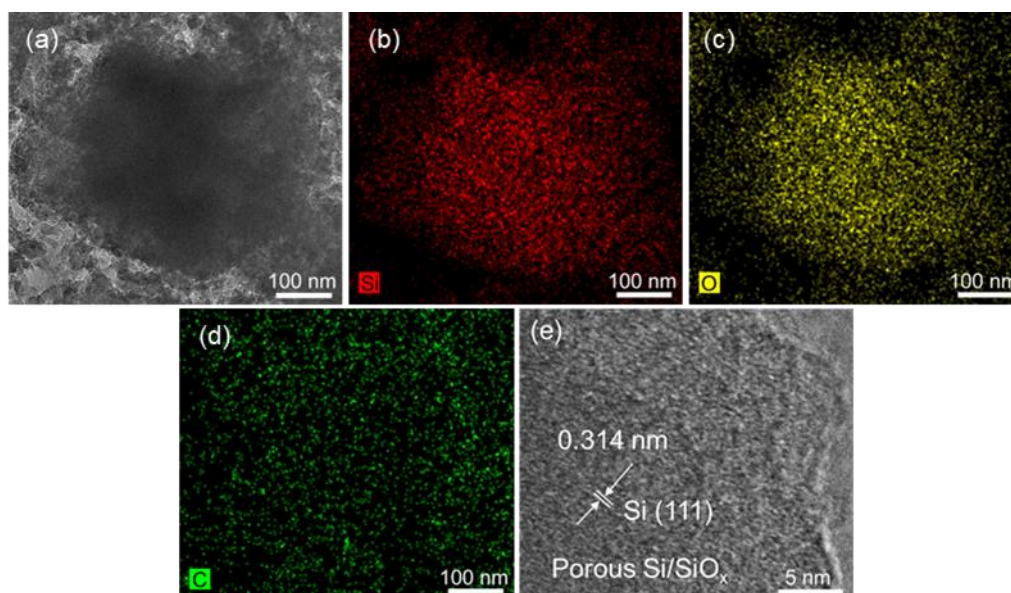

**Fig. S23** (a) TEM and (b-d) mapping images of the DP Si/SiO<sub>x</sub>@Li-C after cycling 100 times at 0.1 A g<sup>-1</sup>. (e) HRTEM image.

**Table S1.** Comparison of the electrochemical performance of some Li-ion battery anodes.

| Anodes                                   | Synthesis method                    | Initial CE (%) | Current density (A g <sup>-1</sup> ) | Capacity (mAh g <sup>-1</sup> ) | Cycle number | Ref.      |
|------------------------------------------|-------------------------------------|----------------|--------------------------------------|---------------------------------|--------------|-----------|
| C-SiO <sub>x</sub> /C                    | Polymerizing /interfusing           | 80.7           | 0.09                                 | 836                             | 500          | [1]       |
| Si@mesocarbon-microbeads                 | Magnesiothermic reduction           | 82.0           | 0.2                                  | 421                             | 200          | [2]       |
| Si-C                                     | Magnesiothermic reduction           | 58.7           | 0.1                                  | 769                             | 31           | [3]       |
| SiO <sub>x</sub> @Gr/artificial graphite | Electrochemical exfoliation/coating | 72.1           | 0.37                                 | 400                             | 50           | [4]       |
| Si/C-2                                   | Magnesiothermic reduction           | 99.0           | 0.5                                  | 300                             | 200          | [5]       |
| Graphite-Si@pyroprotein                  | Mixed drying/carbonization          | 61.9           | 0.05                                 | 400                             | 100          | [6]       |
| C-SiO <sub>x</sub> @Si/rGO               | Modified Hummers method             | 60.9           | 1                                    | 925                             | 100          | [7]       |
| Porous-Si/C                              | Magnesiothermic reduction           | 84.0           | 0.06                                 | 624                             | 120          | [8]       |
| Si/carbon nanorod                        | Evaporation-induced method          | 46.4           | 0.1                                  | 600                             | 100          | [9]       |
| MSi@SiO <sub>x</sub> /rGO                | Modified Hummers method             | 88.8           | 1                                    | 836                             | 1000         | [10]      |
| Nanoporous Si/graphite                   | Solution-chemical dealloying        | 62.5           | 0.5                                  | 328                             | 100          | [11]      |
| Si CNFs-200                              | Electrospinning                     | 79.6           | 0.1                                  | 536                             | 100          | [12]      |
| Si@C                                     | Ball milling/spray drying           | 58.8           | 0.1                                  | 402                             | 100          | [13]      |
| DP Si/SiO <sub>x</sub> @Li-C             | Magnesiothermic reduction           | 66.4           | 0.1                                  | 810                             | 100          | This work |

## References

- 1 G. Li, L. B. Huang, M. Y. Yan, J. Y. Li, K. C. Jiang, Y. X. Yin, S. Xin, Q. Xu, Y. G. Guo, *Nano Energy*, 2020, **74**, 104890.
- 2 J. T. Du, J. K. M, Z. T. Liu, W. C. Wang, H. N. Jia, M. X. Zhang, Y. Nie, *Mater. Lett.*,

- 2022, **315**, 131921.
- 3 L. F. Guo, S. Y. Zhang, J. Xie, D. Zheng, Y. Jin, K. Y. Wang, D. G. Zhuang, W. Q. Zheng, X. B. Zhao, *Int. J. Miner. Metall. Mater.*, 2020, **27**, 515-525.
  - 4 L. Lee, Wang, W. T. A. Ran, J.-H. Lee, S. M. Hwang, Y.-J. Kim, *Chem. Eng. J.*, 2022, **442**, 136166.
  - 5 J. Zhang, S. Zuo, Y. Q. Wang, H. H. Yin, Z. Q. Wang, J. Wang, *J. Power Sources*, 2021, **495**, 229803.
  - 6 S. M. Cho, J. Yoon, Y. S. Yun, H.-J. Jin, *ACS Appl. Energy Mater.*, 2022, **5**, 15538-15547.
  - 7 T. Meng, B. Li, Q. S. Wang, J. N. Hao, B. B. Huang, F. L. Gu, H. M. Xu, P. Liu, Y. X. Tong, *ACS Nano*, 2020, **14**, 7066-7076.
  - 8 J. H. Wang, C. H. Chuang, P. W. Chi, T. Paul, P. Chandan, K. W. Yeh, C. C. Chang, S. P. Prakoso, Y. C. Chiu, M. K. Wu, *ACS Appl. Nano Mater.*, 2023, **6**, 12578-12587.
  - 9 X. R. Li, H. P. Su, C. Ma, Y. C. Cong, J. Wang, H. Z. Lin, Y. Z. Shang, H. L. Liu, *Mater. Lett.*, 2022, **324**, 132636.
  - 10 S. Q. Ou, C. Liu, R. G. Yang, W. J. Fan, Z. Z. Xie, B. Li, T. Meng, C. J. Zou, D. Shu, Y. X. Tong, *Energy Storage Mater.*, 2024, **73**, 103814.
  - 11 Y. B. Liu, X. Y. Liu, Y. L. Zhu, J. W. Wang, W. W. Ji, X. Z. Liu, *Energy Fuels*, 2023, **37**, 4624-4631.
  - 12 X. H. Li, X. X. Wang, J. J. Li, G. Liu, D. C. Jia, Z. L. Ma, L. Zhang, Z. Peng, X. Y. Zhu, *Electrochem. Commun.*, 2022, **137**, 107257.
  - 13 S. Y. Zhang, J. Xie, C. Wu, X. B. Zhao, *Int. J. Electrochem. Sci.*, 2020, **15**, 6582-6595.
